# Supplementary material for: Bridging-arylene effects on spectroscopic and photophysical properties of arylborane–dipyrrinato zinc(ii) complexes
Source: Royal Society of Chemistry journal article supplement (doi:10.1039/d0ra09029h), 2021-01-01
Supplement: d0ra09029h1.pdf [file d0ra09029h1.pdf]

## Supplementary Information (SI)

### **Bridging-Arylene Effects on Spectroscopic and Photophysical Properties of Arylborane–Dipyrrinato Zinc(II) Complexes**

Koyo Takaki,<sup>a</sup> Eri Sakuda,<sup>a\*</sup> Akitaka Ito,<sup>b</sup> Shinnosuke Horiuchi,<sup>a</sup> Yasuhiro Arikawa<sup>a</sup> and Keisuke Umakoshi<sup>a\*</sup>

<sup>a</sup>*Division of Chemistry and Materials Science, Graduate School of Engineering, Nagasaki University, Bunkyo-machi 1-14, Nagasaki 852-8521, Japan*

<sup>b</sup>*Graduate School of Engineering, Kochi University of Technology, Miyanokuchi 185, Tosayamada, Kami, Kochi 782-8502, Japan*

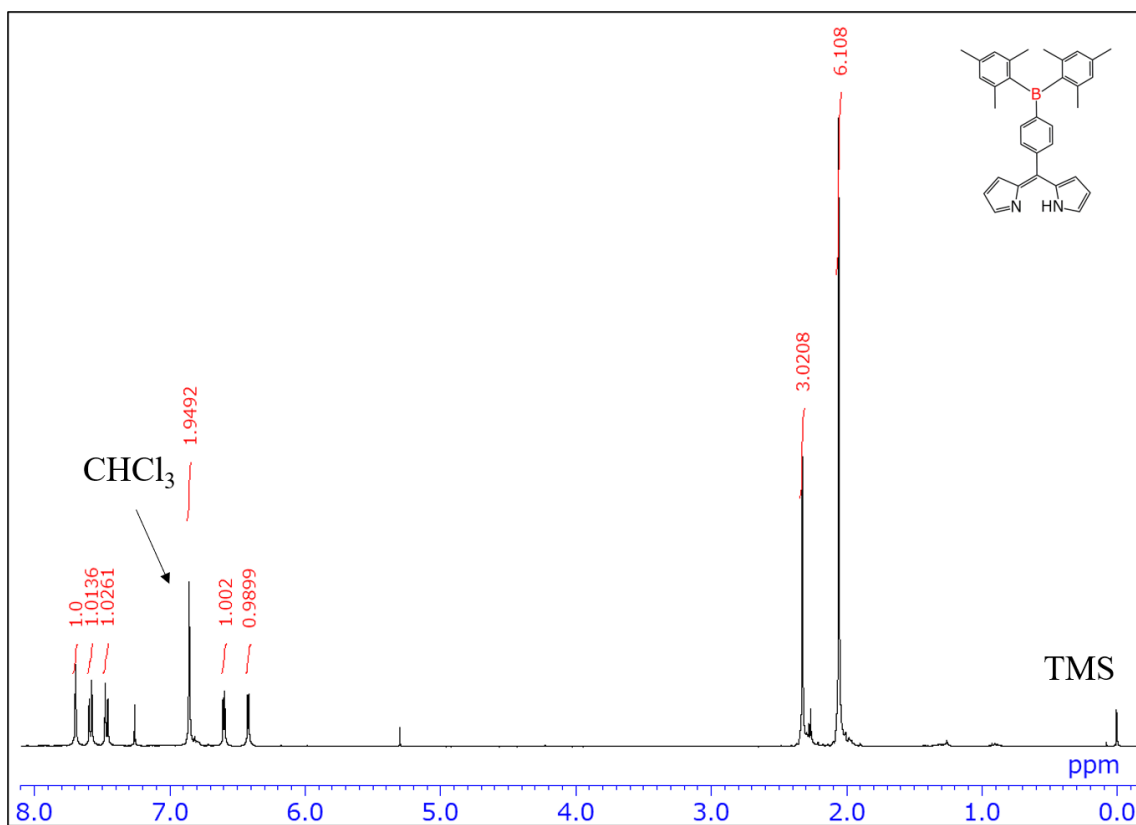

**Figure S1.** <sup>1</sup>H NMR spectra of 5-{4-(dimesitylboryl)phenyl}dipyrrin in CDCl<sub>3</sub> at 298 K.

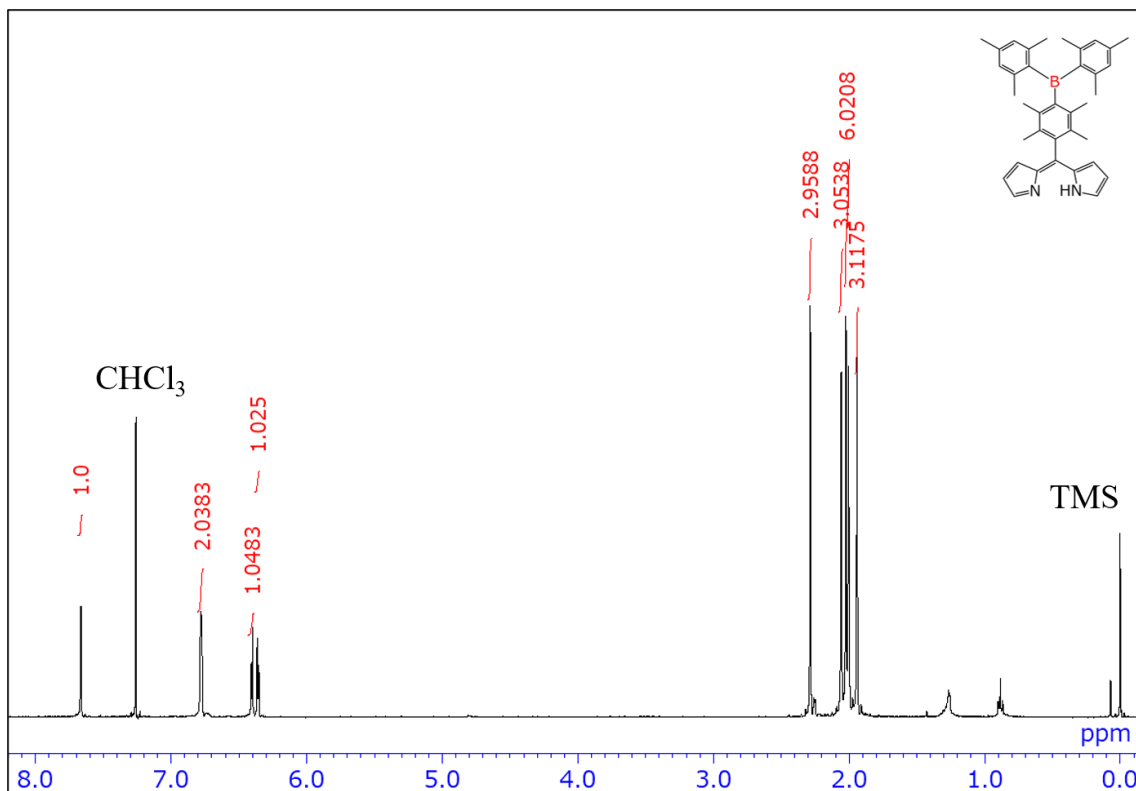

**Figure S2.** <sup>1</sup>H NMR spectra of **3** in CDCl<sub>3</sub> at 298 K.

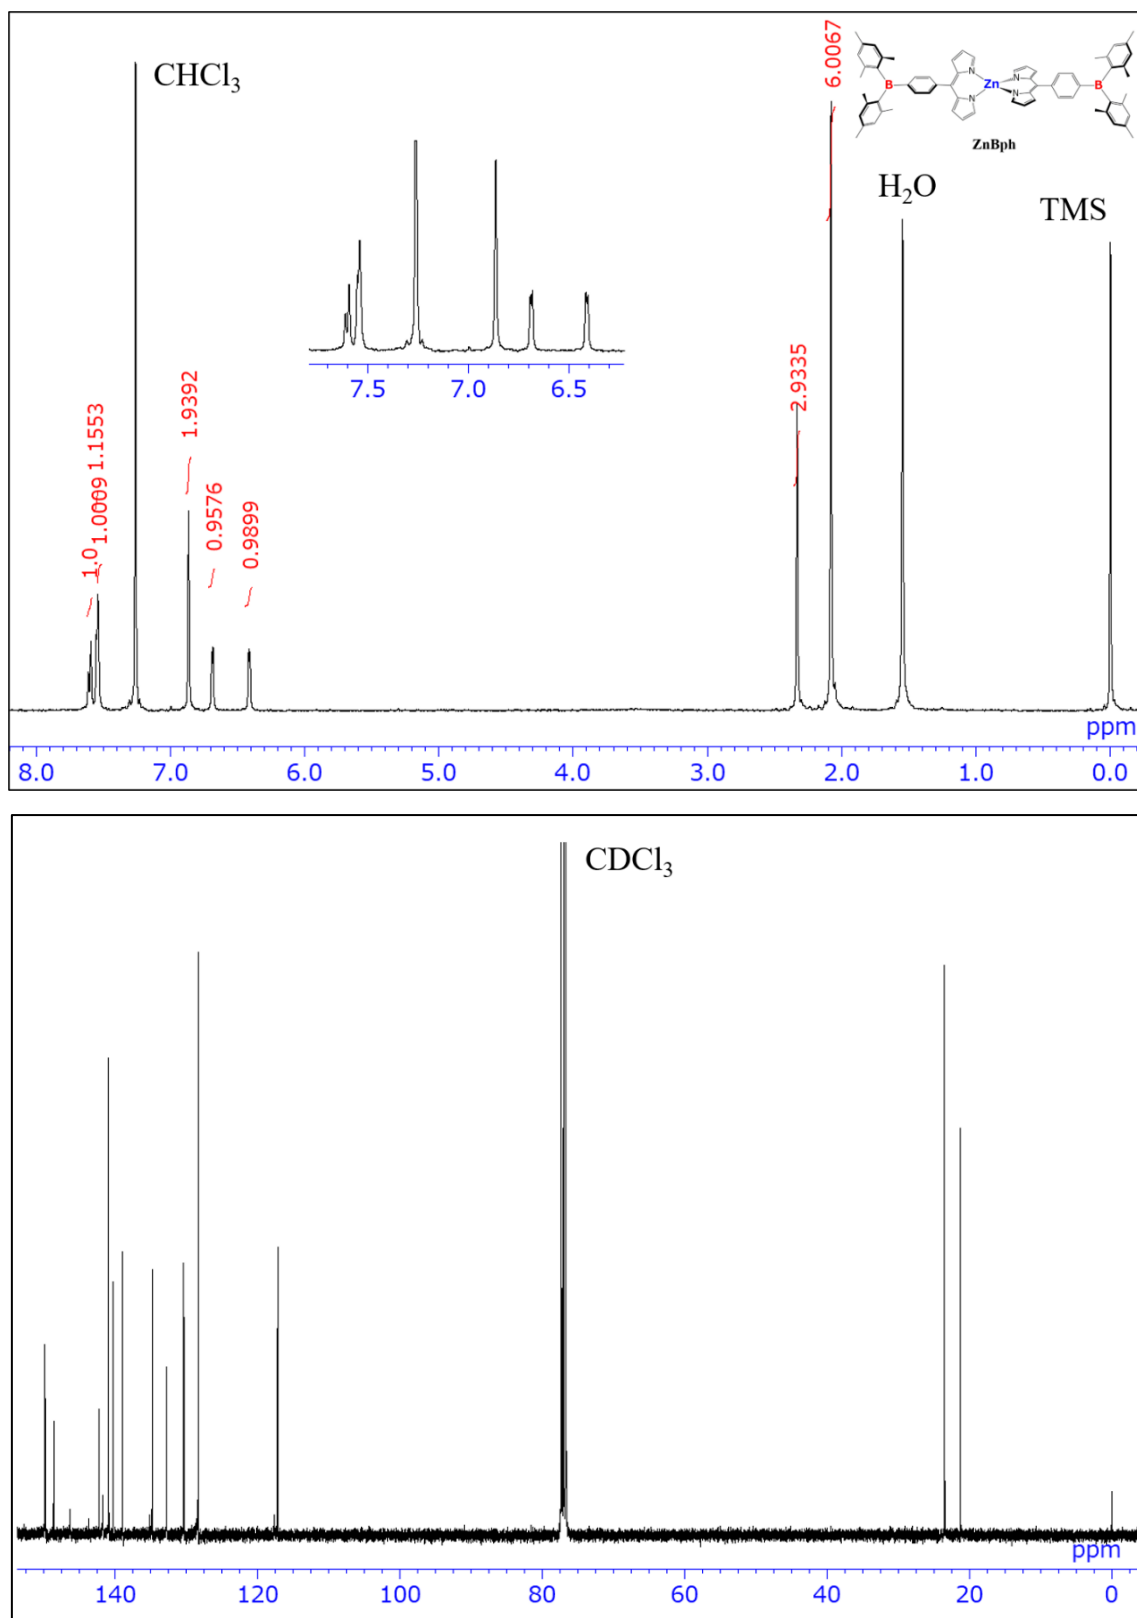

Figure S3. <sup>1</sup>H (top) and <sup>13</sup>C{<sup>1</sup>H} NMR spectra (bottom) of ZnBph in CDCl<sub>3</sub> at 298 K.

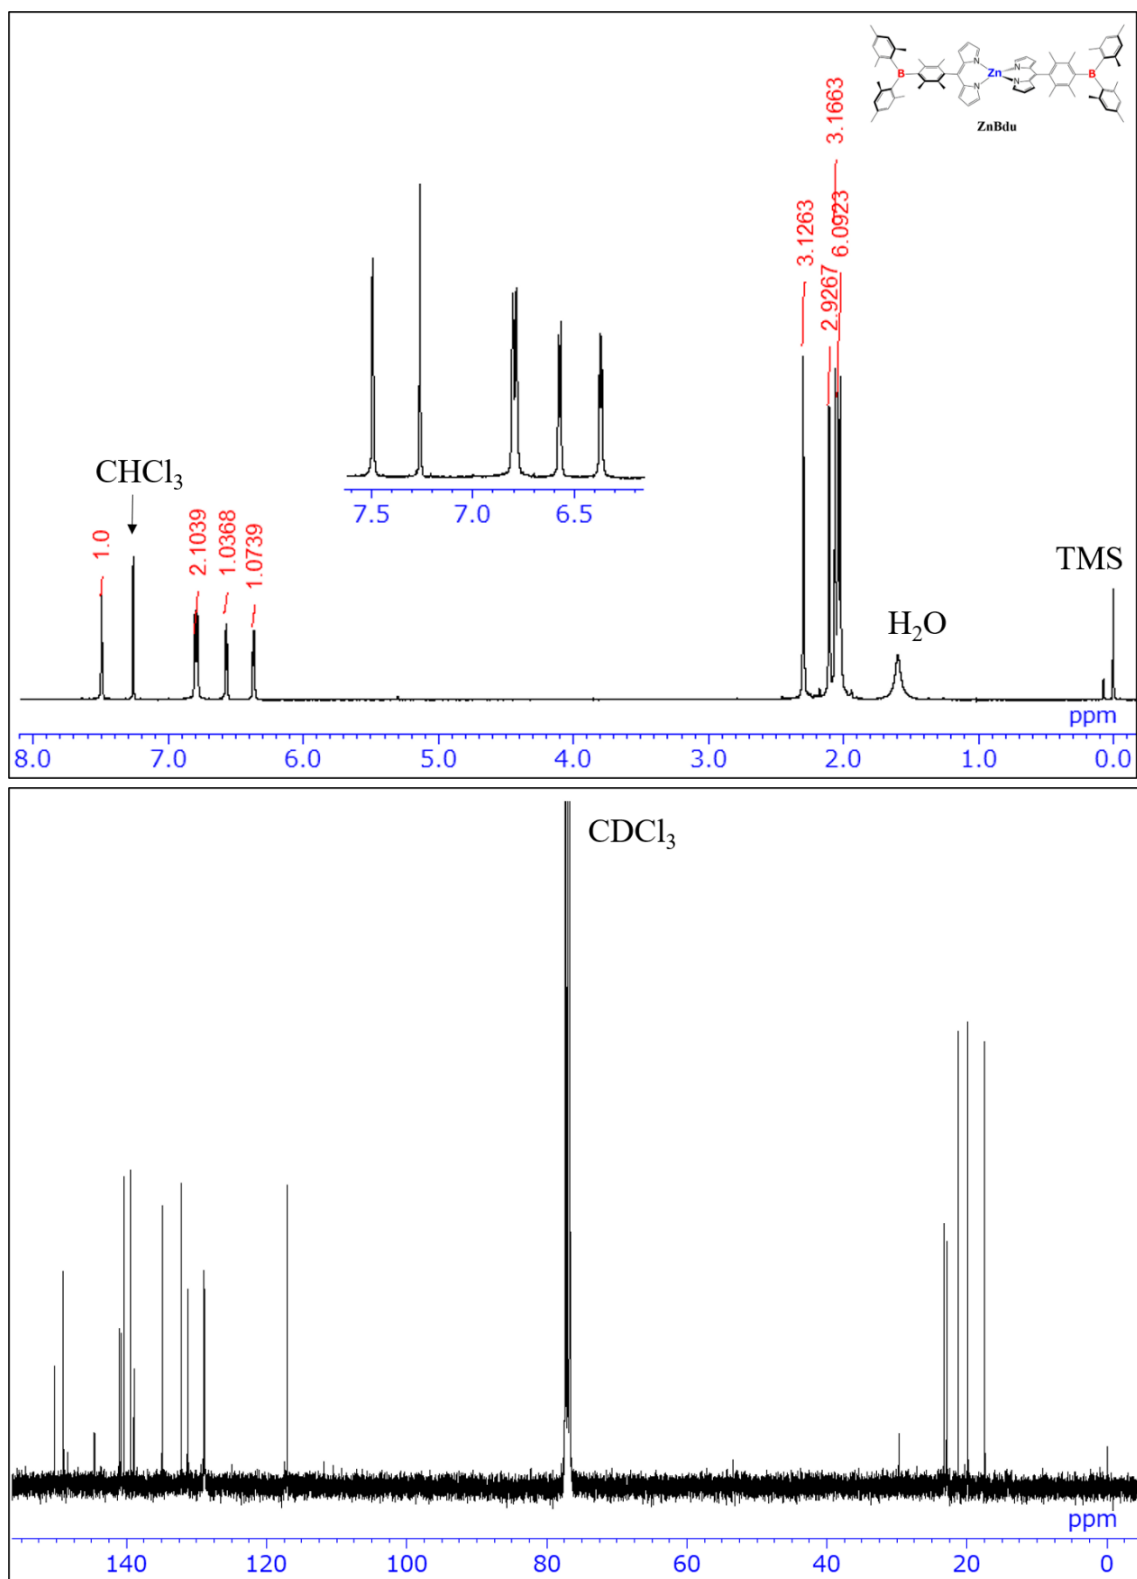

**Figure S4.** <sup>1</sup>H (top) and <sup>13</sup>C{<sup>1</sup>H} NMR spectra (bottom) of **ZnBdu** in CDCl<sub>3</sub> at 298 K.

**Table S1.** Crystallographic Data for **ZnBdu**.

|                                                 |                                                                  |
|-------------------------------------------------|------------------------------------------------------------------|
| formula                                         | C <sub>74</sub> H <sub>80</sub> B <sub>2</sub> N <sub>4</sub> Zn |
| fw                                              | 1112.47                                                          |
| crystal system                                  | cubic                                                            |
| space group                                     | $\bar{I}43d$ (#220)                                              |
| color of crystal                                | orange                                                           |
| crystal size (mm)                               | 0.13 × 0.11 × 0.11                                               |
| <i>a</i> (Å)                                    | 26.536(4)                                                        |
| <i>b</i> (Å)                                    | 26.536(4)                                                        |
| <i>c</i> (Å)                                    | 26.536(4)                                                        |
| $\alpha$ (deg)                                  | 90                                                               |
| $\beta$ (deg)                                   | 90                                                               |
| $\gamma$ (deg)                                  | 90                                                               |
| <i>V</i> (Å <sup>3</sup> )                      | 18686(4)                                                         |
| <i>Z</i>                                        | 12                                                               |
| $\rho_{\text{calc}}$ (g cm <sup>-3</sup> )      | 1.186                                                            |
| $\mu(\text{Mo K}\alpha)$ (cm <sup>-1</sup> )    | 4.402                                                            |
| <i>F</i> (000)                                  | 7104.00                                                          |
| $2\theta_{\text{max}}$ (deg)                    | 52.0                                                             |
| no. of all reflns collected                     | 66863                                                            |
| no. of all unique reflns                        | 3075                                                             |
| <i>R</i> <sub>int</sub>                         | 0.1121                                                           |
| no. of obsd reflns <sup>a</sup>                 | 3072                                                             |
| no. of parameters                               | 190                                                              |
| <i>R</i> <sub>1</sub> <sup>a,b</sup>            | 0.0587                                                           |
| w <i>R</i> <sub>2</sub> (all data) <sup>c</sup> | 0.1209                                                           |
| GOF (all data) <sup>d</sup>                     | 1.280                                                            |
| CCDC number                                     | 2035525                                                          |

<sup>a</sup>  $I > 2\sigma(I)$ . <sup>b</sup>  $R_1 = \Sigma ||F_o| - |F_c|| / \Sigma |F_o|$ .

<sup>c</sup>  $wR_2 = \{\Sigma w(F_o^2 - F_c^2)^2 / \Sigma w(F_o^2)^2\}^{1/2}$ .

<sup>d</sup>  $\text{GOF} = [\Sigma w(F_o^2 - F_c^2)^2 / (N_o - N_v)]^{1/2}$ , where

$N_o$  and  $N_v$  denote the number of observations and variables, respectively.

**Table S2.** Calculated Excited States of **ZnBph**.

| Excited State   | Transition                                                                               | Energy (Wavelength)   | Oscillator Strength |
|-----------------|------------------------------------------------------------------------------------------|-----------------------|---------------------|
| S <sub>1</sub>  | MO255 → MO256 (66%)<br>MO255 → MO257 (34%)                                               | 2.6473 eV (468.35 nm) | 0.0005              |
| S <sub>2</sub>  | MO254 → MO257 (47%)<br>MO255 → MO257 (53%)                                               | 2.6516 eV (467.59 nm) | 0.0004              |
| S <sub>3</sub>  | MO254 → MO256 (22%)<br>MO254 → MO257 (38%)<br>MO255 → MO256 (40%)                        | 2.9424 eV (421.37 nm) | 0.3013              |
| S <sub>4</sub>  | MO254 → MO256 (40%)<br>MO254 → MO259 (12%)<br>MO255 → MO257 (48%)                        | 2.9729 eV (417.04 nm) | 0.3694              |
| S <sub>5</sub>  | MO253 → MO256 (62%)<br>MO253 → MO257 (38%)                                               | 3.2874 eV (377.15 nm) | 0.0641              |
| S <sub>6</sub>  | MO253 → MO256 (13%)<br>MO254 → MO258 (37%)<br>MO255 → MO256 (9%)<br>MO255 → MO258 (41%)  | 3.3077 eV (374.84 nm) | 0.1594              |
| S <sub>7</sub>  | MO252 → MO256 (26%)<br>MO252 → MO259 (18%)<br>MO255 → MO259 (56%)                        | 3.3382 eV (371.42 nm) | 0.1662              |
| S <sub>8</sub>  | MO252 → MO257 (65%)<br>MO255 → MO259 (35%)                                               | 3.3528 eV (369.80 nm) | 0.0726              |
| S <sub>9</sub>  | MO250 → MO256 (53%)<br>MO250 → MO257 (33%)<br>MO251 → MO256 (14%)                        | 3.3887 eV (365.88 nm) | 0.2798              |
| S <sub>10</sub> | MO249 → MO257 (12%)<br>MO250 → MO256 (22%)<br>MO250 → MO257 (13%)<br>MO251 → MO257 (53%) | 3.3983 eV (364.84 nm) | 0.0708              |
| S <sub>11</sub> | MO254 → MO258                                                                            | 3.4410 eV (360.31 nm) | 0.0003              |
| S <sub>12</sub> | MO249 → MO257                                                                            | 3.4899 eV (355.27 nm) | 0.0322              |
| S <sub>13</sub> | MO248 → MO256 (62%)<br>MO248 → MO257 (38%)                                               | 3.4931 eV (354.94 nm) | 0.0422              |
| S <sub>14</sub> | MO254 → MO259 (52%)<br>MO255 → MO259 (48%)                                               | 3.4988 eV (354.36 nm) | 0.0001              |
| S <sub>15</sub> | MO245 → MO256 (32%)<br>MO246 → MO256 (30%)<br>MO246 → MO257 (18%)<br>MO247 → MO257 (20%) | 3.5618 eV (348.10 nm) | 0.0387              |
| S <sub>16</sub> | MO244 → MO257 (9%)<br>MO245 → MO257 (15%)                                                | 3.5646 eV (347.82 nm) | 0.0164              |

|                 |                                                                                          |                       |        |
|-----------------|------------------------------------------------------------------------------------------|-----------------------|--------|
|                 | MO246 → MO256 (30%)<br>MO246 → MO257 (19%)<br>MO247 → MO256 (18%)<br>MO247 → MO259 ( 9%) |                       |        |
| S <sub>17</sub> | MO245 → MO256 (52%)<br>MO245 → MO257 (27%)<br>MO247 → MO256 (21%)                        | 3.5712 eV (347.18 nm) | 0.0337 |
| S <sub>18</sub> | MO245 → MO257 (22%)<br>MO247 → MO257 (15%)<br>MO253 → MO257 (63%)                        | 3.5814 eV (346.19 nm) | 0.0158 |
| S <sub>19</sub> | MO244 → MO257 (18%)<br>MO245 → MO257 (42%)<br>MO247 → MO257 (25%)<br>MO253 → MO256 (15%) | 3.5858 eV (345.76 nm) | 0.0998 |
| S <sub>20</sub> | MO252 → MO256 (60%)<br>MO252 → MO257 (40%)                                               | 3.6085 eV (343.59 nm) | 0.0015 |
| S <sub>21</sub> | MO251 → MO256 (60%)<br>MO251 → MO257 (40%)                                               | 3.6465 eV (340.01 nm) | 0.0012 |
| S <sub>22</sub> | MO243 → MO256 (76%)<br>MO250 → MO257 (24%)                                               | 3.6664 eV (338.17 nm) | 0.0886 |
| S <sub>23</sub> | MO242 → MO257 (17%)<br>MO250 → MO257 (83%)                                               | 3.6708 eV (337.76 nm) | 0.0059 |
| S <sub>24</sub> | MO242 → MO257 (20%)<br>MO243 → MO257 (80%)                                               | 3.6946 eV (335.58 nm) | 0.0006 |
| S <sub>25</sub> | MO249 → MO256 (59%)<br>MO249 → MO257 (41%)                                               | 3.7063 eV (334.53 nm) | 0.0000 |
| S <sub>26</sub> | MO248 → MO257                                                                            | 3.7391 eV (331.59 nm) | 0.0001 |
| S <sub>27</sub> | MO253 → MO256 (21%)<br>MO253 → MO257 (16%)<br>MO253 → MO258 (63%)                        | 3.7417 eV (331.36 nm) | 0.0635 |
| S <sub>28</sub> | MO244 → MO256 (52%)<br>MO245 → MO256 (16%)<br>MO245 → MO257 (32%)                        | 3.7573 eV (329.98 nm) | 0.0039 |
| S <sub>29</sub> | MO244 → MO257 (66%)<br>MO245 → MO256 (34%)                                               | 3.7645 eV (329.35 nm) | 0.0045 |
| S <sub>30</sub> | MO244 → MO256 (10%)<br>MO247 → MO256 (53%)<br>MO247 → MO257 (37%)                        | 3.7855 eV (327.53 nm) | 0.0001 |
| S <sub>31</sub> | MO246 → MO257                                                                            | 3.8097 eV (325.45 nm) | 0.0007 |
| S <sub>32</sub> | MO252 → MO257 (25%)<br>MO252 → MO259 (75%)                                               | 3.8118 eV (325.27 nm) | 0.0723 |
| S <sub>33</sub> | MO242 → MO256 (31%)<br>MO242 → MO257 (24%)                                               | 3.8383 eV (323.02 nm) | 0.0060 |

|                 |                                                                                                                                        |                       |        |
|-----------------|----------------------------------------------------------------------------------------------------------------------------------------|-----------------------|--------|
|                 | MO243 → MO256 (27%)<br>MO243 → MO257 (18%)                                                                                             |                       |        |
| S <sub>34</sub> | MO242 → MO257 (69%)<br>MO243 → MO256 (31%)                                                                                             | 3.8428 eV (322.64 nm) | 0.0039 |
| S <sub>35</sub> | MO250 → MO256 (16%)<br>MO250 → MO257 (12%)<br>MO250 → MO258 (72%)                                                                      | 3.8666 eV (320.65 nm) | 0.0007 |
| S <sub>36</sub> | MO240 → MO256 (20%)<br>MO241 → MO256 (12%)<br>MO249 → MO259 (11%)<br>MO251 → MO259 (57%)                                               | 3.8900 eV (318.73 nm) | 0.0128 |
| S <sub>37</sub> | MO241 → MO256 (46%)<br>MO241 → MO257 (27%)<br>MO250 → MO256 (11%)<br>MO250 → MO258 (16%)                                               | 3.8957 eV (318.26 nm) | 0.2376 |
| S <sub>38</sub> | MO240 → MO257 (42%)<br>MO241 → MO257 (12%)<br>MO251 → MO257 (14%)<br>MO251 → MO259 (32%)                                               | 3.9211 eV (316.20 nm) | 0.1703 |
| S <sub>39</sub> | MO241 → MO256 (12%)<br>MO248 → MO256 (16%)<br>MO248 → MO257 (12%)<br>MO248 → MO258 (60%)                                               | 3.9606 eV (313.05 nm) | 0.0808 |
| S <sub>40</sub> | MO249 → MO257 (21%)<br>MO249 → MO259 (79%)                                                                                             | 3.9719 eV (312.15 nm) | 0.0391 |
| S <sub>41</sub> | MO238 → MO256 (12%)<br>MO238 → MO257 (12%)<br>MO239 → MO256 (48%)<br>MO239 → MO257 (28%)                                               | 4.0049 eV (309.58 nm) | 0.0306 |
| S <sub>42</sub> | MO238 → MO257                                                                                                                          | 4.0198 eV (308.44 nm) | 0.0146 |
| S <sub>43</sub> | MO238 → MO256 ( 7%)<br>MO239 → MO256 (17%)<br>MO239 → MO257 (12%)<br>MO246 → MO256 (12%)<br>MO246 → MO257 ( 9%)<br>MO246 → MO258 (43%) | 4.0239 eV (308.12 nm) | 0.0013 |
| S <sub>44</sub> | MO238 → MO257 (16%)<br>MO247 → MO257 (17%)<br>MO247 → MO259 (67%)                                                                      | 4.0507 eV (306.08 nm) | 0.0195 |
| S <sub>45</sub> | MO241 → MO257                                                                                                                          | 4.2024 eV (295.04 nm) | 0.0001 |
| S <sub>46</sub> | MO240 → MO256 (59%)<br>MO240 → MO257 (41%)                                                                                             | 4.2077 eV (294.66 nm) | 0.0001 |
| S <sub>47</sub> | MO252 → MO258                                                                                                                          | 4.2791 eV (289.75 nm) | 0.0000 |



|                 |               |                       |        |
|-----------------|---------------|-----------------------|--------|
| S <sub>48</sub> | MO253 → MO259 | 4.3045 eV (288.03 nm) | 0.0000 |
| S <sub>49</sub> | MO251 → MO258 | 4.3204 eV (286.97 nm) | 0.0000 |
| S <sub>50</sub> | MO245 → MO258 | 4.3250 eV (286.67 nm) | 0.0014 |

HOMO: MO255, LUMO: MO256

**Table S3.** Molecular-Orbital Contributions of **ZnBph**.

| Molecular<br>Orbital | Eigenvalue<br>/ Hartrees | MO Contribution / % |            |           |       |         |
|----------------------|--------------------------|---------------------|------------|-----------|-------|---------|
|                      |                          | zinc                | Bph-dipy   |           |       |         |
|                      |                          |                     | dipyrinate | phenylene | boron | mesityl |
| 259 (LUMO+3)         | -0.05902                 | 0.14                | 17.44      | 27.27     | 25.60 | 29.55   |
| 258 (LUMO+2)         | -0.06117                 | 0.15                | 18.32      | 23.16     | 24.29 | 34.08   |
| 257 (LUMO+1)         | -0.08369                 | 0.49                | 76.99      | 14.58     | 3.83  | 4.11    |
| 256 (LUMO)           | -0.08438                 | 0.55                | 76.78      | 14.41     | 3.85  | 4.41    |
| 255 (HOMO)           | -0.19805                 | 0.02                | 96.35      | 3.54      | 0.01  | 0.08    |
| 254 (HOMO-1)         | -0.19870                 | 0.01                | 96.68      | 3.22      | 0.01  | 0.08    |
| 253 (HOMO-2)         | -0.22306                 | 0.00                | 0.13       | 11.07     | 1.36  | 87.44   |
| 252 (HOMO-3)         | -0.22428                 | 0.00                | 0.21       | 11.02     | 1.28  | 87.49   |

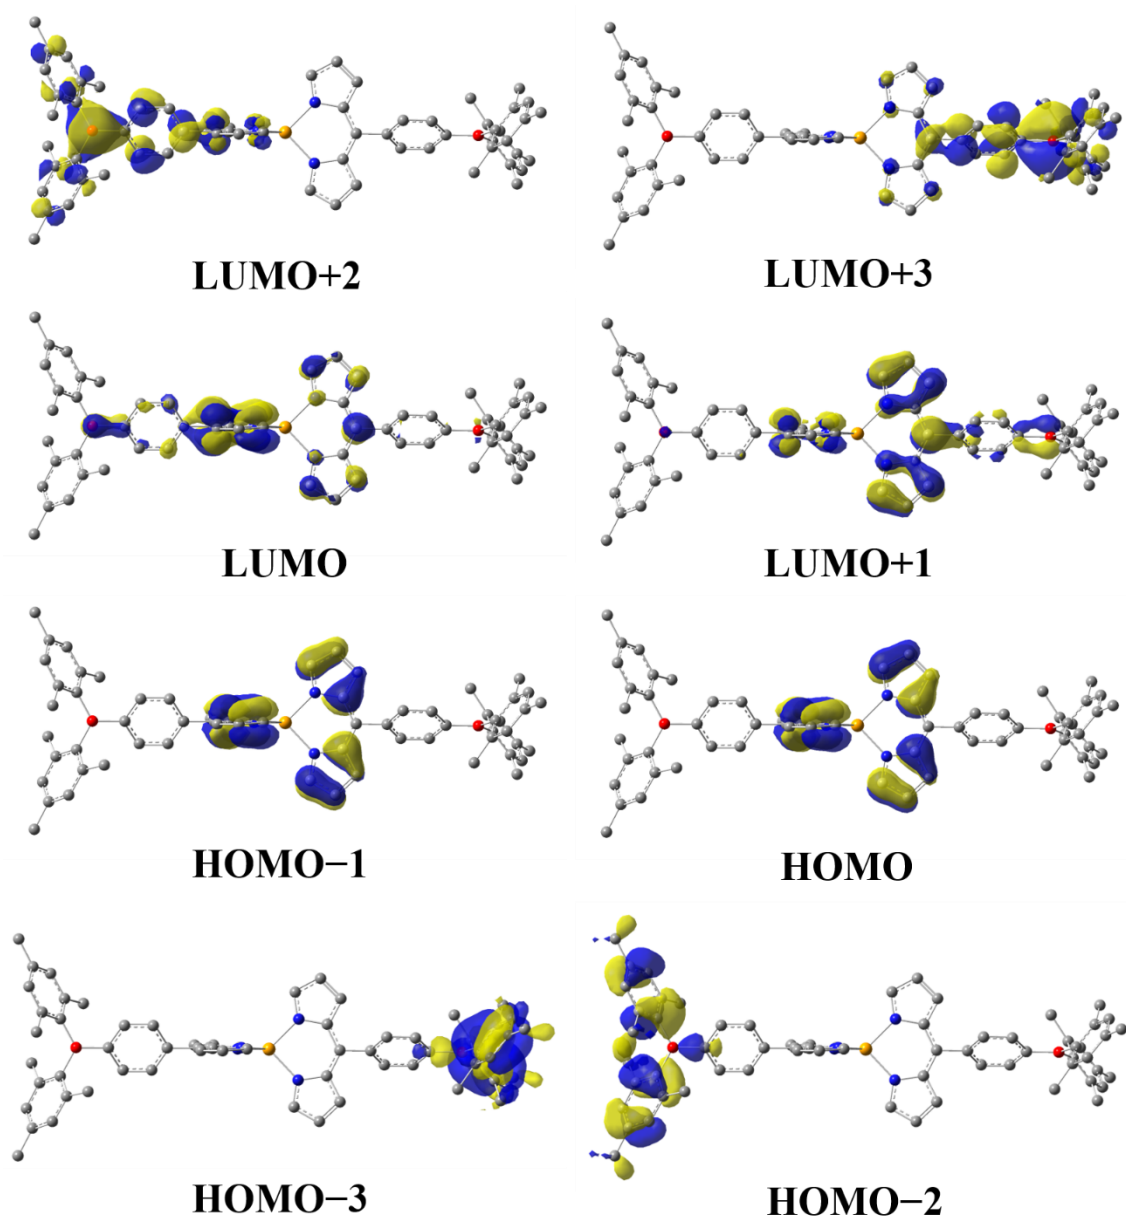

*Figure S5.* Kohn–Sham molecular orbitals of **ZnBph**.

**Table S4.** Calculated Excited States of **ZnBdu**.

| Excited State   | Transition                                                                               | Energy (Wavelength)   | Oscillator Strength |
|-----------------|------------------------------------------------------------------------------------------|-----------------------|---------------------|
| S <sub>1</sub>  | MO287 → MO288                                                                            | 2.7222 eV (455.45 nm) | 0.0000              |
| S <sub>2</sub>  | MO286 → MO288 (10%)<br>MO286 → MO289 (48%)<br>MO287 → MO289 (42%)                        | 2.7258 eV (454.86 nm) | 0.0000              |
| S <sub>3</sub>  | MO284 → MO288 (20%)<br>MO286 → MO288 (38%)<br>MO286 → MO289 (21%)<br>MO287 → MO288 (21%) | 3.0648 eV (404.54 nm) | 0.3419              |
| S <sub>4</sub>  | MO286 → MO289                                                                            | 3.0747 eV (403.24 nm) | 0.3580              |
| S <sub>5</sub>  | MO282 → MO289 (18%)<br>MO284 → MO288 (58%)<br>MO287 → MO289 (24%)                        | 3.2098 eV (386.26 nm) | 0.1475              |
| S <sub>6</sub>  | MO284 → MO288 (32%)<br>MO285 → MO288 (16%)<br>MO285 → MO289 (35%)<br>MO286 → MO289 (17%) | 3.2147 eV (385.68 nm) | 0.1858              |
| S <sub>7</sub>  | MO280 → MO288 (22%)<br>MO281 → MO288 (13%)<br>MO281 → MO289 (65%)                        | 3.2883 eV (377.05 nm) | 0.0007              |
| S <sub>8</sub>  | MO280 → MO288                                                                            | 3.2883 eV (377.05 nm) | 0.0000              |
| S <sub>9</sub>  | MO286 → MO290 (52%)<br>MO287 → MO290 (48%)                                               | 3.3230 eV (373.11 nm) | 0.0009              |
| S <sub>10</sub> | MO287 → MO291                                                                            | 3.3279 eV (372.56 nm) | 0.0008              |
| S <sub>11</sub> | MO287 → MO290                                                                            | 3.4882 eV (355.44 nm) | 0.0000              |
| S <sub>12</sub> | MO286 → MO291 (56%)<br>MO287 → MO291 (44%)                                               | 3.4963 eV (354.62 nm) | 0.0000              |
| S <sub>13</sub> | MO285 → MO288                                                                            | 3.5395 eV (350.29 nm) | 0.0002              |
| S <sub>14</sub> | MO284 → MO288 (15%)<br>MO284 → MO289 (70%)<br>MO285 → MO289 (15%)                        | 3.5421 eV (350.03 nm) | 0.0001              |
| S <sub>15</sub> | MO283 → MO288 (74%)<br>MO284 → MO288 (26%)                                               | 3.5500 eV (349.25 nm) | 0.0004              |
| S <sub>16</sub> | MO282 → MO288 (14%)<br>MO282 → MO289 (64%)<br>MO285 → MO289 (22%)                        | 3.5512 eV (349.14 nm) | 0.0041              |
| S <sub>17</sub> | MO283 → MO290 (64%)<br>MO284 → MO290 (36%)                                               | 3.6154 eV (342.93 nm) | 0.1603              |
| S <sub>18</sub> | MO282 → MO291 (63%)<br>MO285 → MO291 (37%)                                               | 3.6230 eV (342.21 nm) | 0.1828              |

|                 |                                                                                                                                                               |                       |        |
|-----------------|---------------------------------------------------------------------------------------------------------------------------------------------------------------|-----------------------|--------|
| S <sub>19</sub> | MO280 → MO290                                                                                                                                                 | 3.6645 eV (338.34 nm) | 0.3213 |
| S <sub>20</sub> | MO280 → MO290 (37%)<br>MO281 → MO291 (63%)                                                                                                                    | 3.6703 eV (337.80 nm) | 0.0200 |
| S <sub>21</sub> | MO284 → MO290 (82%)<br>MO285 → MO290 (18%)                                                                                                                    | 3.6871 eV (336.26 nm) | 0.0020 |
| S <sub>22</sub> | MO272 → MO288 (12%)<br>MO273 → MO289 (11%)<br>MO282 → MO288 (60%)<br>MO285 → MO288 (17%)                                                                      | 3.6906 eV (335.95 nm) | 0.0128 |
| S <sub>23</sub> | MO282 → MO288 ( 9%)<br>MO283 → MO288 (10%)<br>MO283 → MO289 (43%)<br>MO284 → MO289 (13%)<br>MO285 → MO291 (25%)                                               | 3.6912 eV (335.89 nm) | 0.0205 |
| S <sub>24</sub> | MO285 → MO291                                                                                                                                                 | 3.6921 eV (335.81 nm) | 0.0004 |
| S <sub>25</sub> | MO281 → MO288                                                                                                                                                 | 3.6938 eV (335.66 nm) | 0.0002 |
| S <sub>26</sub> | MO273 → MO288 (62%)<br>MO282 → MO288 (38%)                                                                                                                    | 3.6958 eV (335.48 nm) | 0.0613 |
| S <sub>27</sub> | MO272 → MO288 (23%)<br>MO280 → MO289 (77%)                                                                                                                    | 3.6972 eV (335.35 nm) | 0.0658 |
| S <sub>28</sub> | MO272 → MO289 (11%)<br>MO273 → MO288 (13%)<br>MO273 → MO289 (15%)<br>MO280 → MO288 ( 9%)<br>MO280 → MO289 (43%)<br>MO283 → MO289 ( 9%)                        | 3.6973 eV (335.34 nm) | 0.0227 |
| S <sub>29</sub> | MO270 → MO288                                                                                                                                                 | 3.7692 eV (328.94 nm) | 0.0870 |
| S <sub>30</sub> | MO279 → MO288 (18%)<br>MO279 → MO289 (82%)                                                                                                                    | 3.7856 eV (327.51 nm) | 0.0005 |
| S <sub>31</sub> | MO278 → MO288                                                                                                                                                 | 3.7864 eV (327.44 nm) | 0.0000 |
| S <sub>32</sub> | MO270 → MO289 (10%)<br>MO274 → MO288 (14%)<br>MO275 → MO289 (18%)<br>MO276 → MO288 (17%)<br>MO277 → MO289 (19%)<br>MO280 → MO288 (10%)<br>MO281 → MO289 (12%) | 3.7973 eV (326.51 nm) | 0.0000 |
| S <sub>33</sub> | MO274 → MO288 (33%)<br>MO276 → MO288 (42%)<br>MO280 → MO288 (25%)                                                                                             | 3.7986 eV (326.40 nm) | 0.0012 |
| S <sub>34</sub> | MO270 → MO288 (18%)<br>MO271 → MO288 (12%)<br>MO271 → MO289 (18%)                                                                                             | 3.8008 eV (326.21 nm) | 0.0000 |

|                 |                                                                                                                                        |                       |        |
|-----------------|----------------------------------------------------------------------------------------------------------------------------------------|-----------------------|--------|
|                 | MO274 → MO288 ( 9%)<br>MO275 → MO289 ( 8%)<br>MO276 → MO288 (12%)<br>MO277 → MO289 (10%)<br>MO280 → MO288 ( 7%)<br>MO281 → MO289 ( 6%) |                       |        |
| S <sub>35</sub> | MO275 → MO288 (18%)<br>MO275 → MO289 (82%)                                                                                             | 3.8664 eV (320.67 nm) | 0.0020 |
| S <sub>36</sub> | MO274 → MO288                                                                                                                          | 3.8671 eV (320.61 nm) | 0.0009 |
| S <sub>37</sub> | MO272 → MO288 (62%)<br>MO273 → MO288 (38%)                                                                                             | 3.8690 eV (320.45 nm) | 0.0045 |
| S <sub>38</sub> | MO272 → MO288 (18%)<br>MO272 → MO289 (82%)                                                                                             | 3.8723 eV (320.18 nm) | 0.0044 |
| S <sub>39</sub> | MO278 → MO289 (14%)<br>MO278 → MO290 (86%)                                                                                             | 3.9054 eV (317.47 nm) | 0.0449 |
| S <sub>40</sub> | MO279 → MO288 (59%)<br>MO279 → MO291 (41%)                                                                                             | 3.9086 eV (317.21 nm) | 0.0148 |
| S <sub>41</sub> | MO279 → MO291                                                                                                                          | 3.9109 eV (317.02 nm) | 0.0314 |
| S <sub>42</sub> | MO278 → MO288 (17%)<br>MO278 → MO289 (83%)                                                                                             | 3.9128 eV (316.87 nm) | 0.0012 |
| S <sub>43</sub> | MO271 → MO288                                                                                                                          | 3.9179 eV (316.45 nm) | 0.0001 |
| S <sub>44</sub> | MO270 → MO289 (54%)<br>MO271 → MO288 (32%)<br>MO271 → MO289 (14%)                                                                      | 3.9230 eV (316.04 nm) | 0.0000 |
| S <sub>45</sub> | MO275 → MO288 (42%)<br>MO277 → MO288 (47%)<br>MO281 → MO288 (11%)                                                                      | 3.9584 eV (313.22 nm) | 0.0000 |
| S <sub>46</sub> | MO274 → MO289 (35%)<br>MO276 → MO288 ( 9%)<br>MO276 → MO289 (45%)<br>MO280 → MO289 (11%)                                               | 3.9615 eV (312.97 nm) | 0.0000 |
| S <sub>47</sub> | MO276 → MO290                                                                                                                          | 3.9805 eV (311.48 nm) | 0.0419 |
| S <sub>48</sub> | MO277 → MO288 (18%)<br>MO277 → MO291 (82%)                                                                                             | 3.9852 eV (311.11 nm) | 0.0303 |
| S <sub>49</sub> | MO275 → MO288 (72%)<br>MO277 → MO291 (28%)                                                                                             | 3.9887 eV (310.84 nm) | 0.0031 |
| S <sub>50</sub> | MO274 → MO288 (17%)                                                                                                                    | 3.9918 eV (310.59 nm) | 0.0003 |

HOMO: MO287, LUMO: MO288

**Table S5.** Molecular-Orbital Contributions of **ZnBdu**.

| Molecular<br>Orbital | Eigenvalue<br>/ Hartrees | MO Contribution / % |            |          |       |         |
|----------------------|--------------------------|---------------------|------------|----------|-------|---------|
|                      |                          | zinc                | Bdu-dipy   |          |       |         |
|                      |                          |                     | dipyrinate | durylene | boron | mesityl |
| 291 (LUMO+3)         | -0.05883                 | 0.01                | 2.00       | 16.16    | 30.35 | 51.48   |
| 290 (LUMO+2)         | -0.05905                 | 0.01                | 2.00       | 16.54    | 30.27 | 51.18   |
| 289 (LUMO+1)         | -0.07798                 | 0.58                | 90.58      | 8.79     | 0.01  | 0.04    |
| 288 (LUMO)           | -0.07804                 | 0.59                | 90.54      | 8.85     | 0.00  | 0.02    |
| 287 (HOMO)           | -0.19579                 | 0.00                | 97.29      | 2.67     | 0.01  | 0.03    |
| 286 (HOMO-1)         | -0.19621                 | 0.00                | 97.33      | 2.63     | 0.01  | 0.03    |
| 285 (HOMO-2)         | -0.21959                 | 0.00                | 3.08       | 81.43    | 0.32  | 15.17   |
| 284 (HOMO-3)         | -0.21963                 | 0.01                | 2.88       | 81.04    | 0.34  | 15.73   |

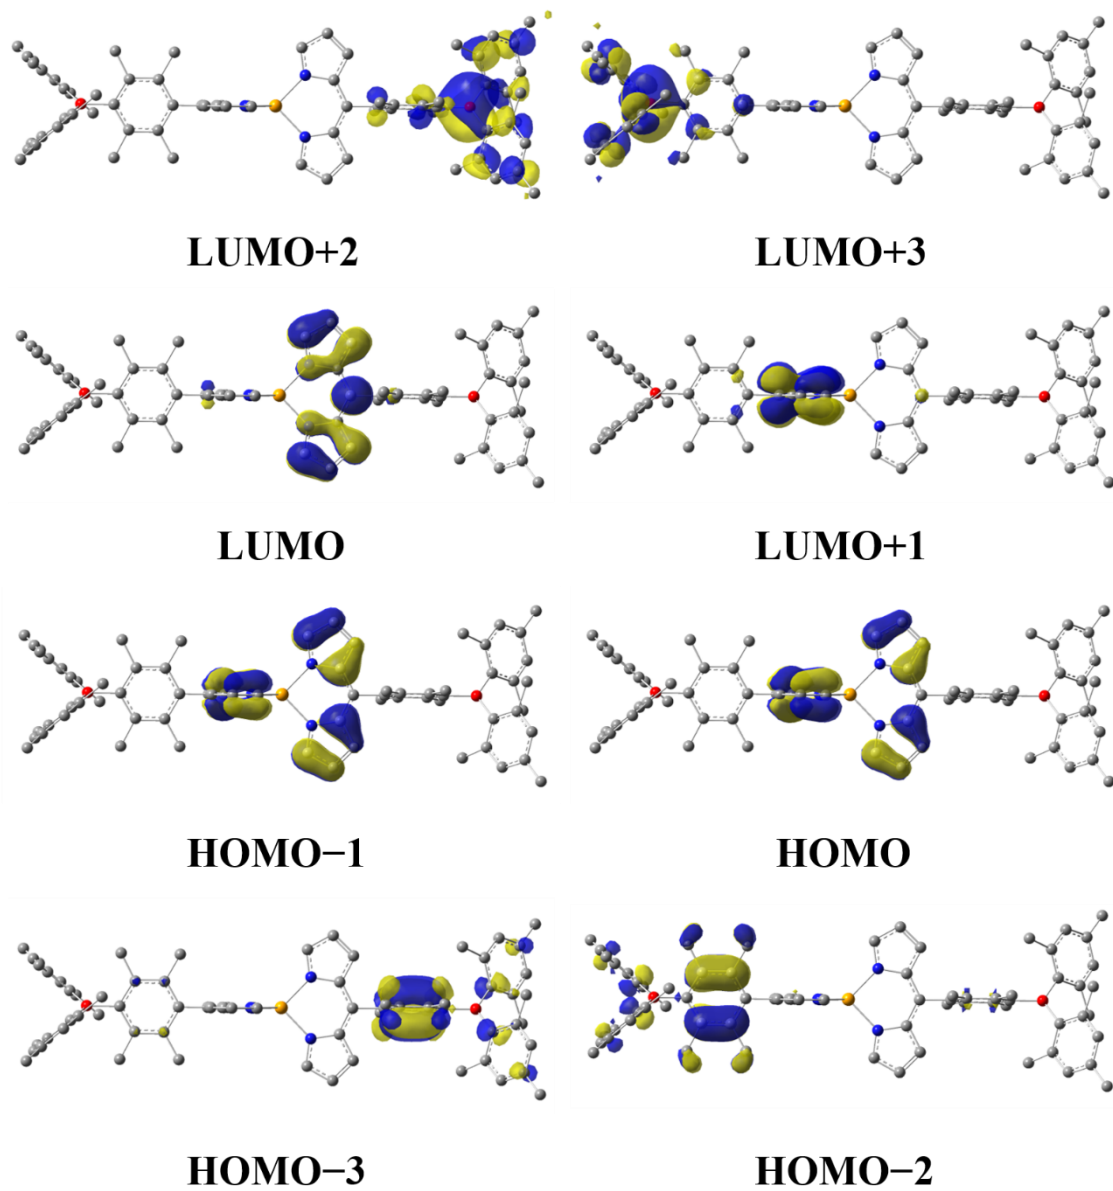

*Figure S6.* Kohn–Sham molecular orbitals of **ZnBdu**.

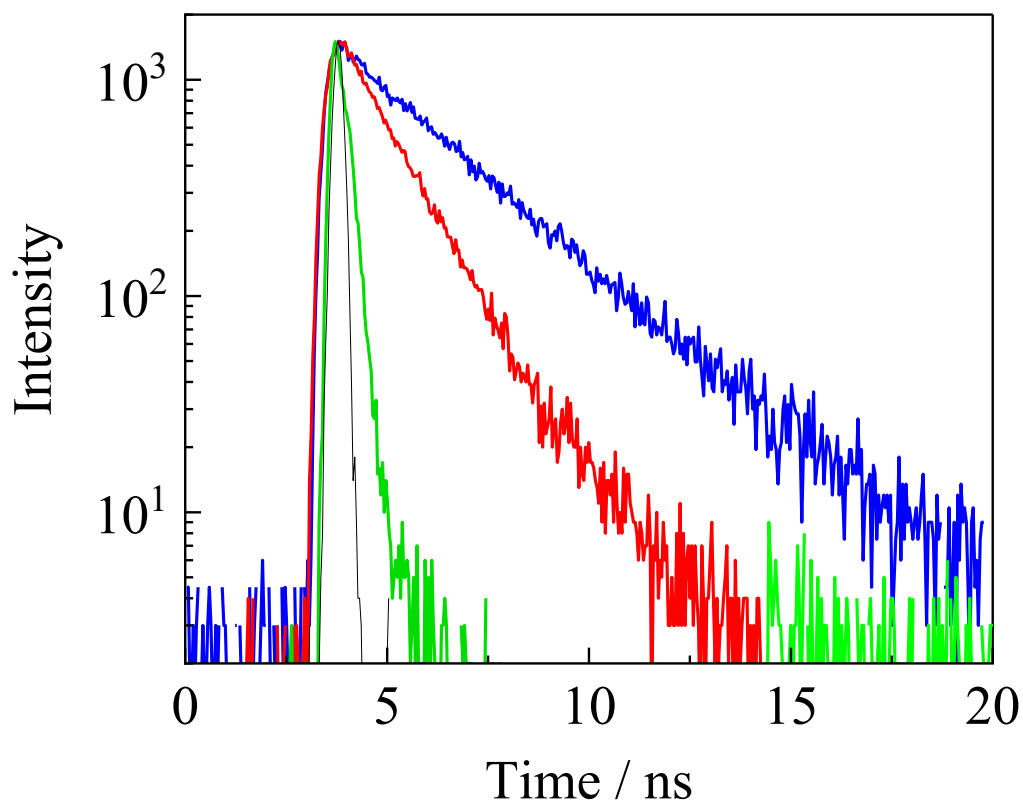

**Figure S7.** Fluorescence decay profiles of **ZnBph** (red), **ZnBdu** (blue) and **ZnBph·2F<sup>-</sup>** (green) in toluene at 298 K. Black curve represents instrumental response function.



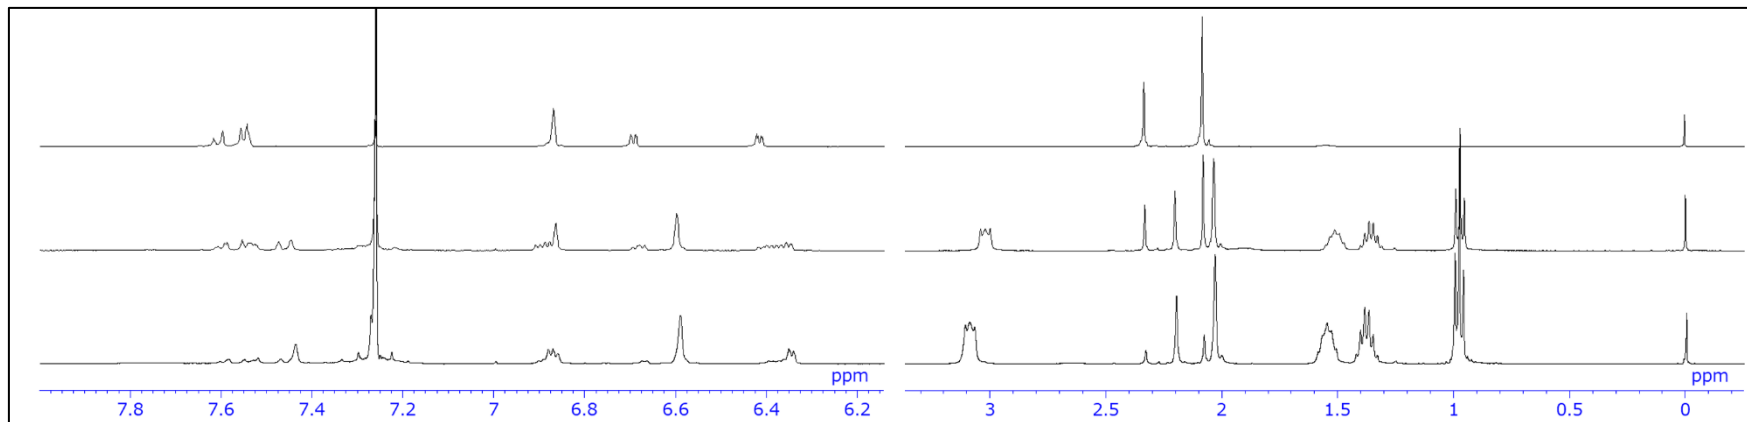

**Figure S8.** <sup>1</sup>H NMR spectra (400 MHz, CDCl<sub>3</sub>) of **ZnBph** in the absence (top) and presence (2 equiv. and 4 equiv.) of TBAF (middle and bottom, respectively).

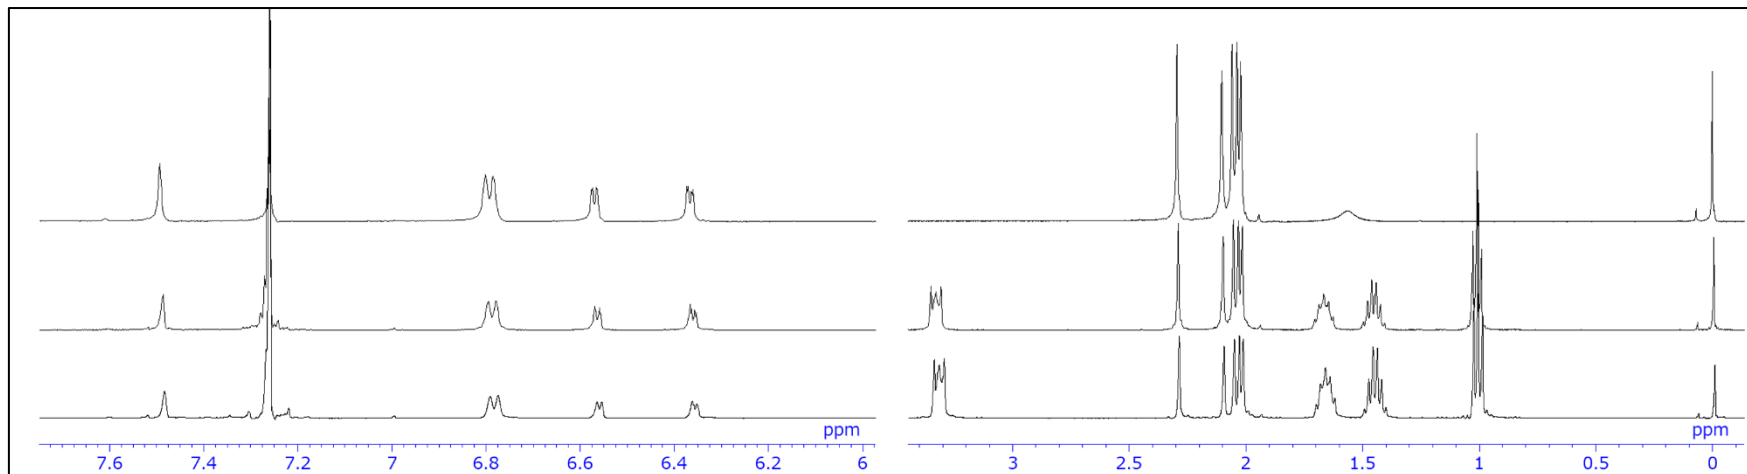

**Figure S9.** <sup>1</sup>H NMR spectra (400 MHz, CDCl<sub>3</sub>) of **ZnBdu** in the absence (top) and presence (2 equiv. and 4 equiv.) of TBAF (middle and bottom, respectively).

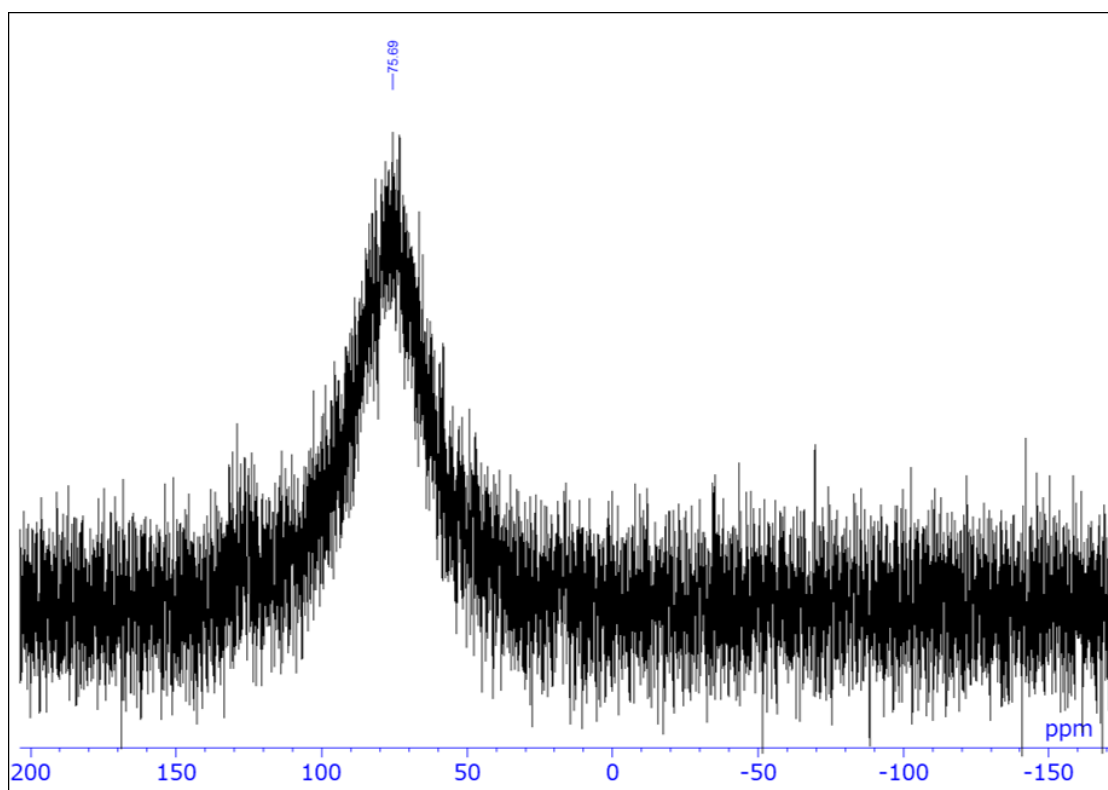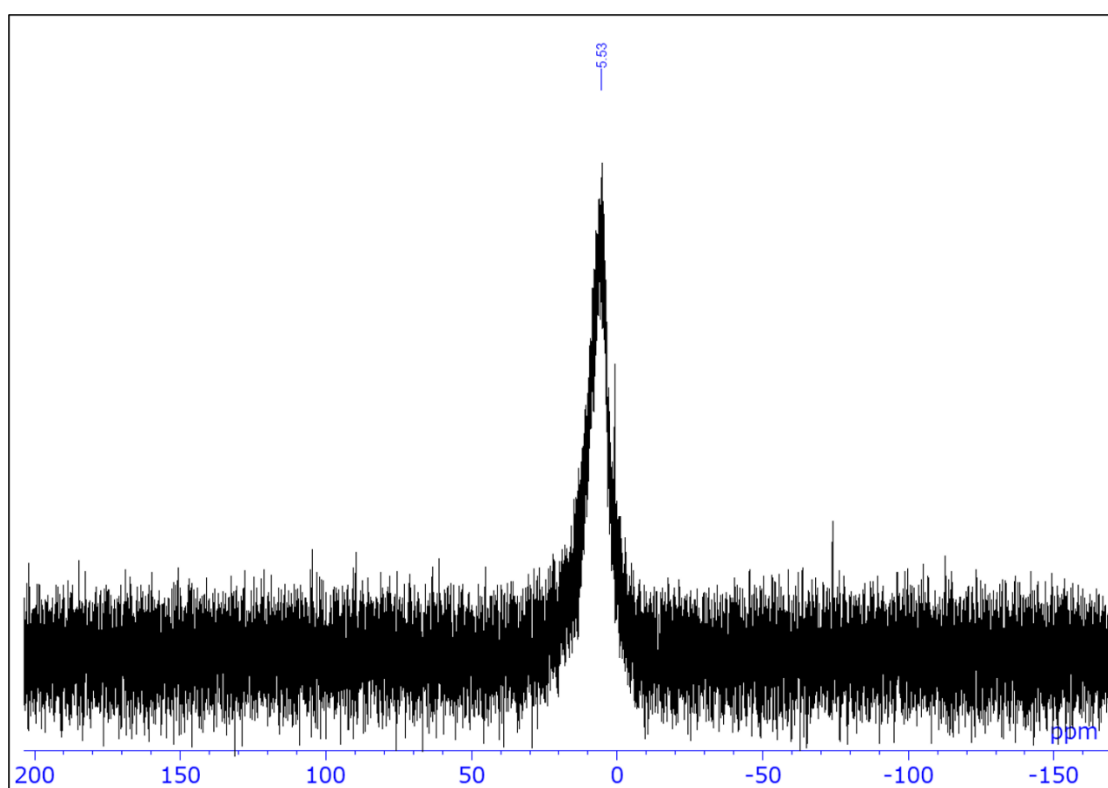

**Figure S10.**  $^{11}\text{B}\{^1\text{H}\}$  NMR spectra (400 MHz,  $\text{CDCl}_3$ ) of **ZnBph** in the absence (top) and presence (4.0 equiv.) of TBAF (bottom).

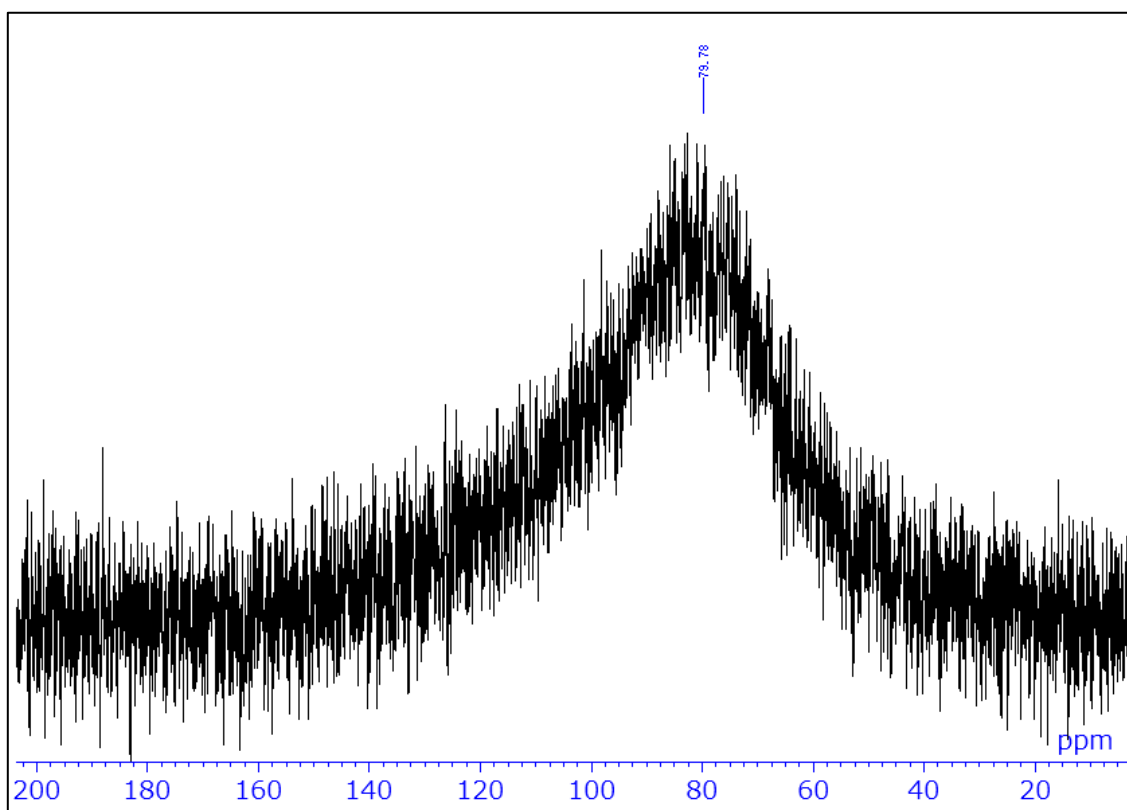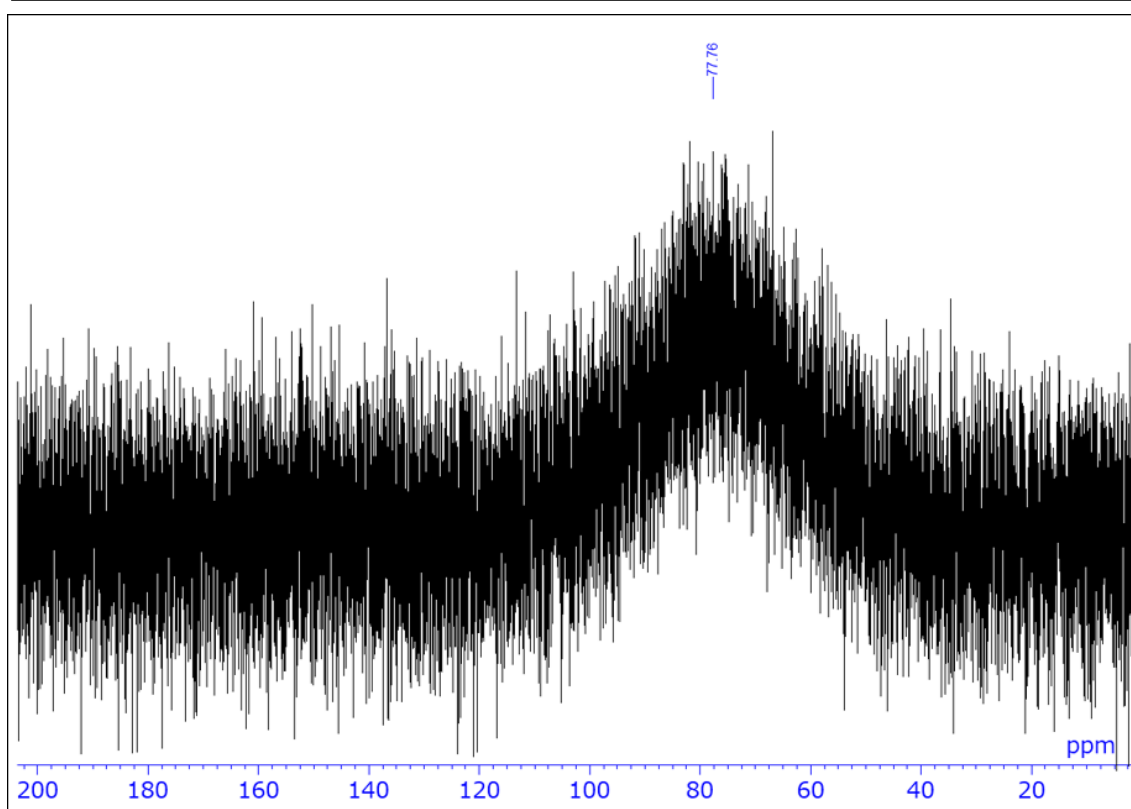

**Figure S11.**  $^{11}\text{B}\{^1\text{H}\}$  NMR spectra (400 MHz,  $\text{CDCl}_3$ ) of **ZnBdu** in the absence (top) and presence (4.0 equiv.) of TBAF (bottom).

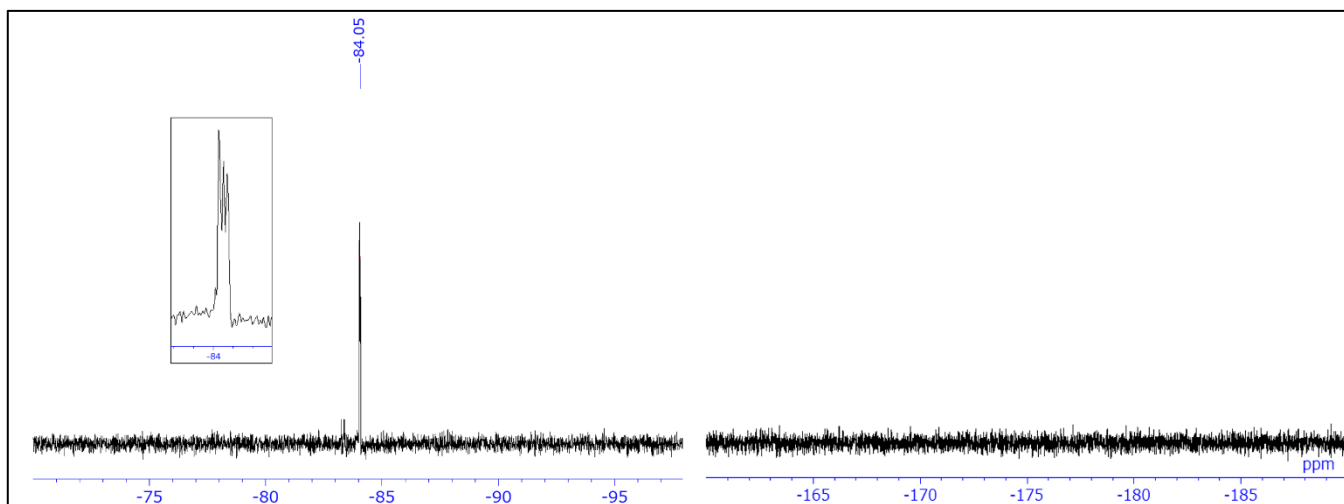

**Figure S12.**  $^{19}\text{F}\{^1\text{H}\}$  NMR spectrum (400 MHz,  $\text{CDCl}_3$ ) of TBAF (existing as  $\text{CDClF}_2$ ).

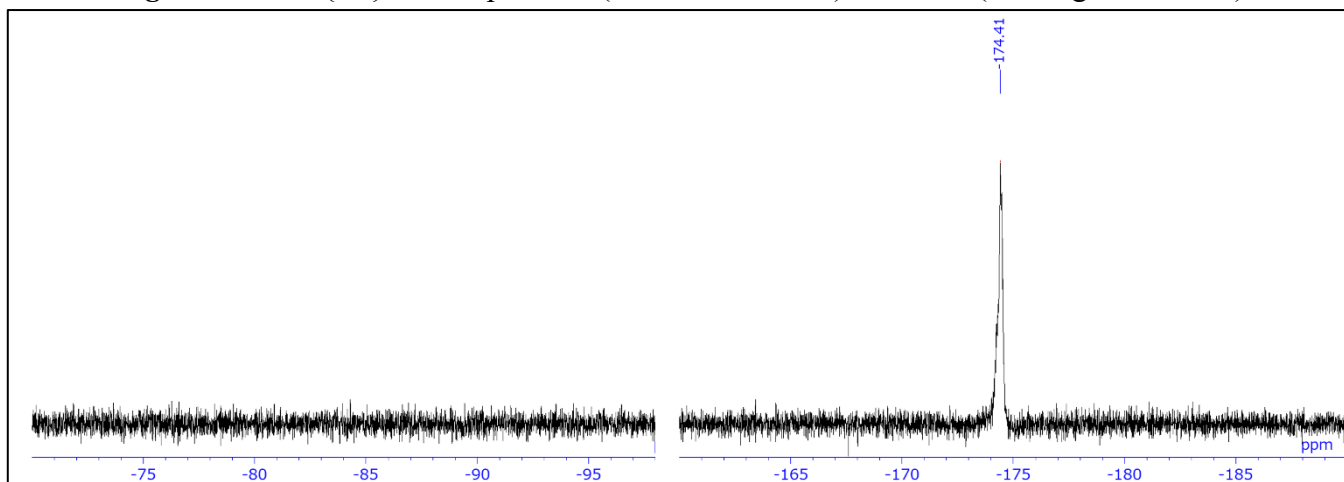

**Figure S13.**  $^{19}\text{F}\{^1\text{H}\}$  NMR spectrum (400 MHz,  $\text{CDCl}_3$ ) of  $\text{ZnBph}$  in the presence of TBAF (4.0 equiv.).

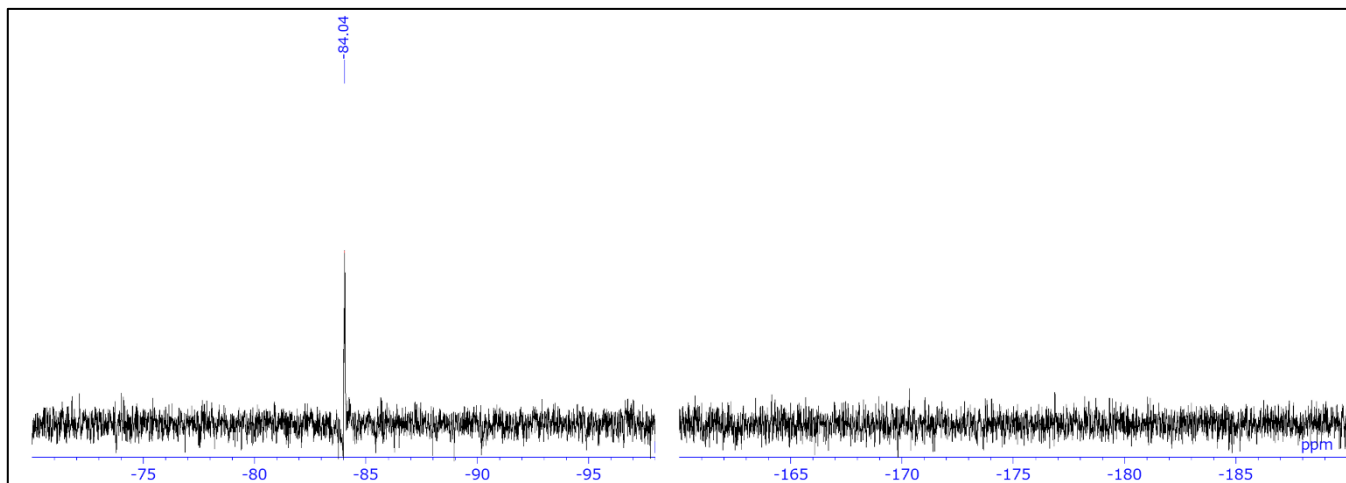

**Figure S14.**  $^{19}\text{F}\{^1\text{H}\}$  NMR spectrum (400 MHz,  $\text{CDCl}_3$ ) of **ZnBdu** in the presence of TBAF (4.0 equiv.).

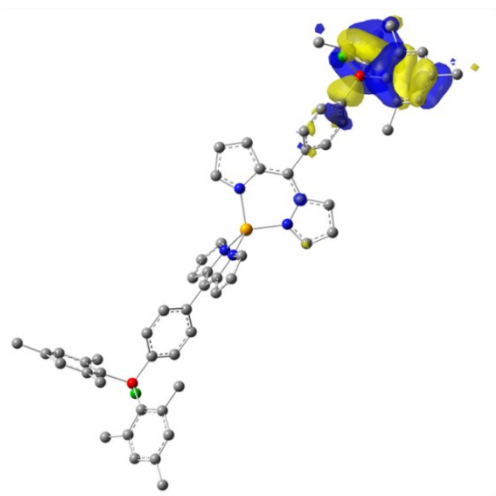

**HOMO-1**

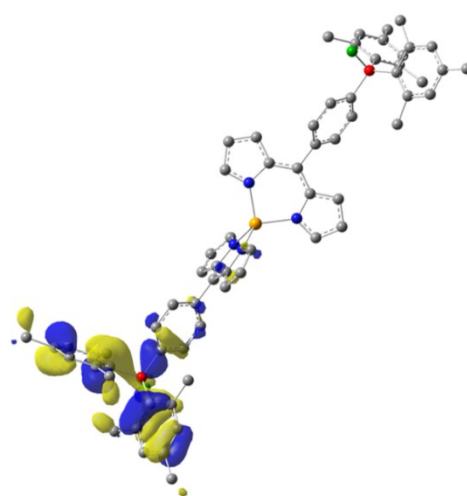

**HOMO**

*Figure S15.* Kohn–Sham molecular orbitals of **ZnBph·2F<sup>-</sup>**.
